# Supplementary material
Source: Elsevier journal article supplement (https://www.sciencedirect.com/science/article/pii/S0021755722001024)
Supplement: mmc1 [file S0021755722001024:mmc1.docx]

**JPED-D-22-00044 – Supplementary Material**

**Table S1. Clinical characteristics of the MPP group.**

| Indices | Cough (%) | Rales (%) | Pulmonary complications (%) | Heat peak (℃) | Hospitalization days |
| --- | --- | --- | --- | --- | --- |
| Study Group  (n = 46) | 45 (97.82) | 16 (34.78) | 11 (23.91) | 38.4  (37.8, 39.5) | 8 (5, 12) |
